# Supplementary material for: Supramolecular host–guest complexation of Lash's calix[4]azulene with tetraalkylammonium halides and tetrafluoroborate salts: binding and DFT computational studies
Source: Royal Society of Chemistry journal article supplement (doi:10.1039/c5ra07802d), 2015-01-01

## SUPPLEMENTARY INFORMATION

### Supramolecular host-guest complexation of Lash's calix[4]azulene with tetraalkylammonium salts: binding and DFT computational studies

Shofur Rahman,<sup>a</sup> Ahmed Zein,<sup>a</sup> Louise N. Dawe,<sup>b</sup> Grigory Shamov,<sup>c</sup>

Pall Thordason<sup>d</sup> and Paris E. Georghiou<sup>\*a</sup>

<sup>a</sup>. Department of Chemistry, Memorial University of Newfoundland, St. John's, Newfoundland and Labrador, Canada A1B3X7; <sup>b</sup>. Department of Chemistry and Biochemistry, Wilfrid Laurier University, Waterloo, Ontario, Canada N2L 3C5; <sup>c</sup>. Westgrid/ComputeCanada, University of Manitoba, Winnipeg, Manitoba, Canada R3T 2N2; <sup>d</sup>. School of Chemistry, University of New South Wales, Kensington, 2052, Australia.

#### Table of Contents

|                                                                                                                                                                                                | <u>Page</u> |
|------------------------------------------------------------------------------------------------------------------------------------------------------------------------------------------------|-------------|
| Table S1 Summary of association constants from the Uv-vis titrations of the respective tetraalkyl ammonium halides and fluoroborate                                                            | S2          |
| Figure S1: UV-vis spectra of <b>1</b> ; binding model and Screenshot ( <a href="http://www.supramol.com">www.supramol.com</a> ) showing 1:1 binding model for <b>1</b> with TMACl              | S2          |
| Figure S2: UV-vis spectra of <b>1</b> ; binding model and Screenshot ( <a href="http://www.supramol.com">www.supramol.com</a> ) showing 1:1 binding model for <b>1</b> with TMABr              | S3          |
| Figure S3: UV-vis spectra of <b>1</b> ; binding model and Screenshot ( <a href="http://www.supramol.com">www.supramol.com</a> ) showing 1:1 binding model for <b>1</b> with TMAI               | S4          |
| Figure S4: UV-vis spectra of <b>1</b> ; binding model and Screenshot ( <a href="http://www.supramol.com">www.supramol.com</a> ) showing 1:1 binding model for <b>1</b> with TMABF <sub>4</sub> | S5          |
| Figure S5: UV-vis spectra of <b>1</b> ; binding model and Screenshot ( <a href="http://www.supramol.com">www.supramol.com</a> ) showing 1:1 binding model for <b>1</b> with TEABF <sub>4</sub> | S6          |
| Figure S6: UV-vis spectra of <b>1</b> ; binding model and Screenshot ( <a href="http://www.supramol.com">www.supramol.com</a> ) showing 1:1 binding model for <b>1</b> with TBABF <sub>4</sub> | S7          |
| References                                                                                                                                                                                     | S7          |
| Check cif files for <b>1</b>                                                                                                                                                                   | <b>S8</b>   |

Table S1. Summary of association constants determined using Thordarson's *fittingprogram*<sup>2a,b</sup> from the UV-vis titrations of the respective tetraalkylammonium halides and fluoroborate.

| Entry | Salts              | fittingprogram                              |       |         |       |      | Comments                |       |
|-------|--------------------|---------------------------------------------|-------|---------|-------|------|-------------------------|-------|
|       |                    | Association constant (K / M <sup>-1</sup> ) |       |         |       |      | Quality of fit (covfit) |       |
|       |                    | Run 1                                       | Run 2 | Average | ASFU  | STDV | Run 1                   | Run 2 |
| 1     | TMACl              | 7371                                        | 7435  | 7400    | 0.44% | 46   | 0.030                   | 0.024 |
| 2     | TMABr              | 3873                                        | 3772  | 3820    | 1.3%  | 72   | 0.020                   | 0.020 |
| 3     | TMAI               | 2802                                        | 2870  | 2840    | 1.2%  | 48   | 0.015                   | 0.016 |
| 4     | TMABF <sub>4</sub> | 5851                                        | 5994  | 5920    | 1.2%  | 100  | 0.028                   | 0.024 |
| 5     | TEABF <sub>4</sub> | 4988                                        | 5139  | 5060    | 1.5%  | 107  | 0.032                   | 0.015 |
| 6     | TBABF <sub>4</sub> | 3577                                        | 3669  | 3620    | 1.3%  | 65   | 0.010                   | 0.013 |

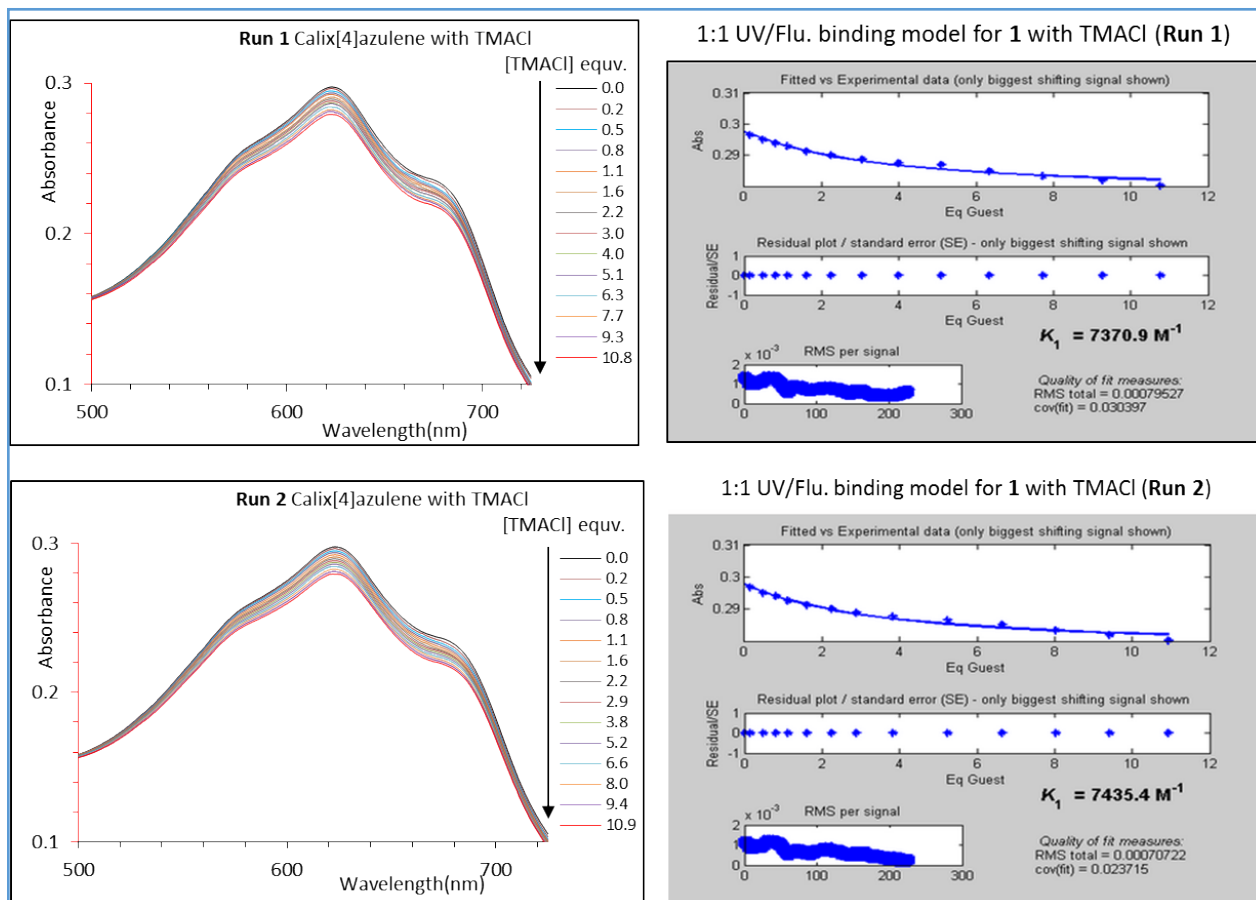

**Figure S1.** Left side(Top and bottom): UV-vis spectra of calix[4]azulene **1** ( $4.82 \times 10^{-5}$  M) upon addition of TMACl (0~10 equivalents) in 9:1, v/v CH<sub>3</sub>Cl/CH<sub>3</sub>OH and Right side(Top and bottom): Screenshot ([www.supramol.com](http://www.supramol.com)) showing 1:1 binding model for calix[4]azulene **1** with TMACl.

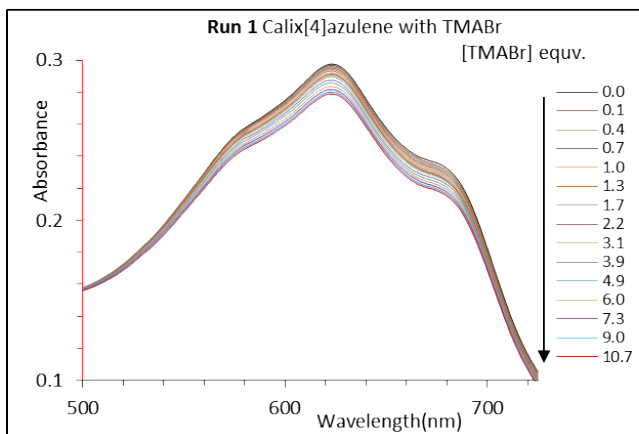

1:1 UV/Flu. binding model for 1 with TMABr (Run 1)

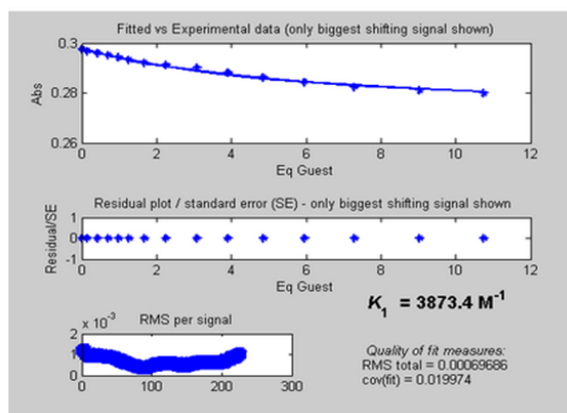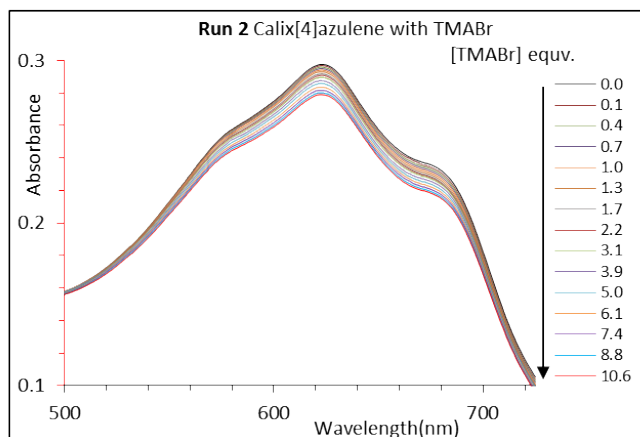

1:1 UV/Flu. binding model for 1 with TMABr (Run 2)

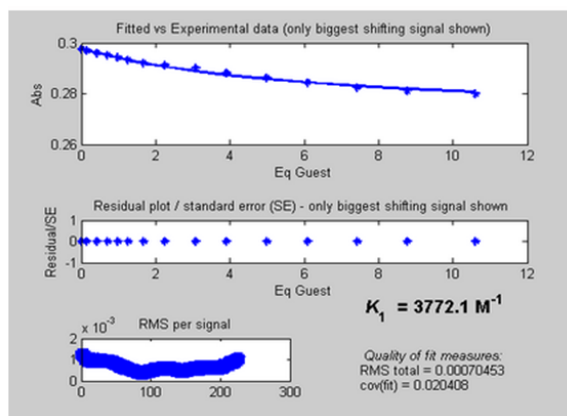

**Figure S2.** Left side(Top and bottom): UV-vis spectra of calix[4]azulene 1 ( $4.82 \times 10^{-5} \text{ M}$ ) upon addition of TMABr (0~10 equivalents) in 9:1,v/v  $\text{CH}_3\text{Cl}/\text{CH}_3\text{OH}$  and Right side(Top and bottom): Screenshot ([www.supramol.com](http://www.supramol.com)) showing 1:1 binding model for calix[4]azulene 1 with TMABr.

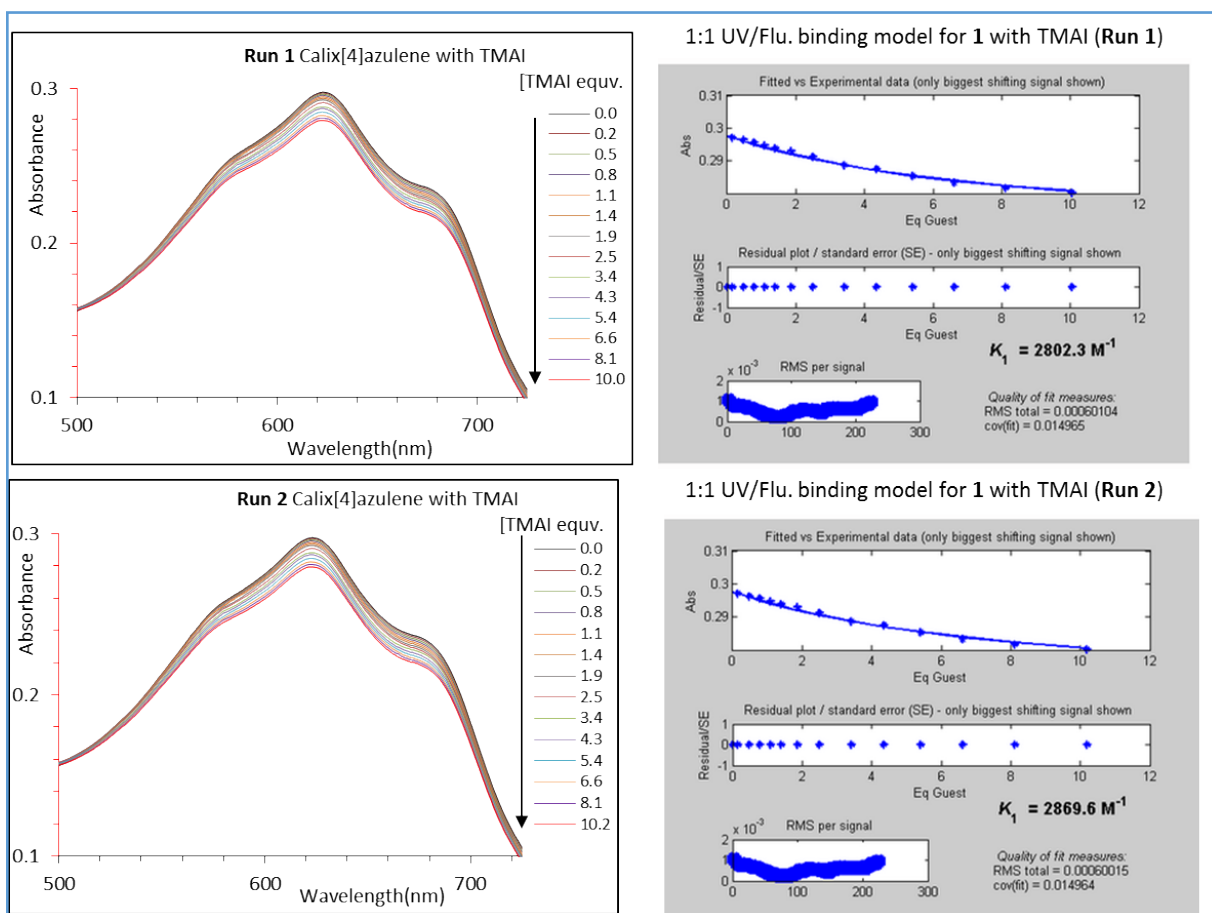

**Figure S3.** *Left side(Top and bottom):* UV-vis spectra of calix[4]azulene **1** ( $4.82 \times 10^{-5} \text{ M}$ ) upon addition of TMAI (0~10 equivalents) in 9:1, v/v  $\text{CH}_3\text{Cl}/\text{CH}_3\text{OH}$  and *Right side(Top and bottom):* Screenshot ([www.supramol.com](http://www.supramol.com)) showing 1:1 binding model for calix[4]azulene **1** with TMAI.

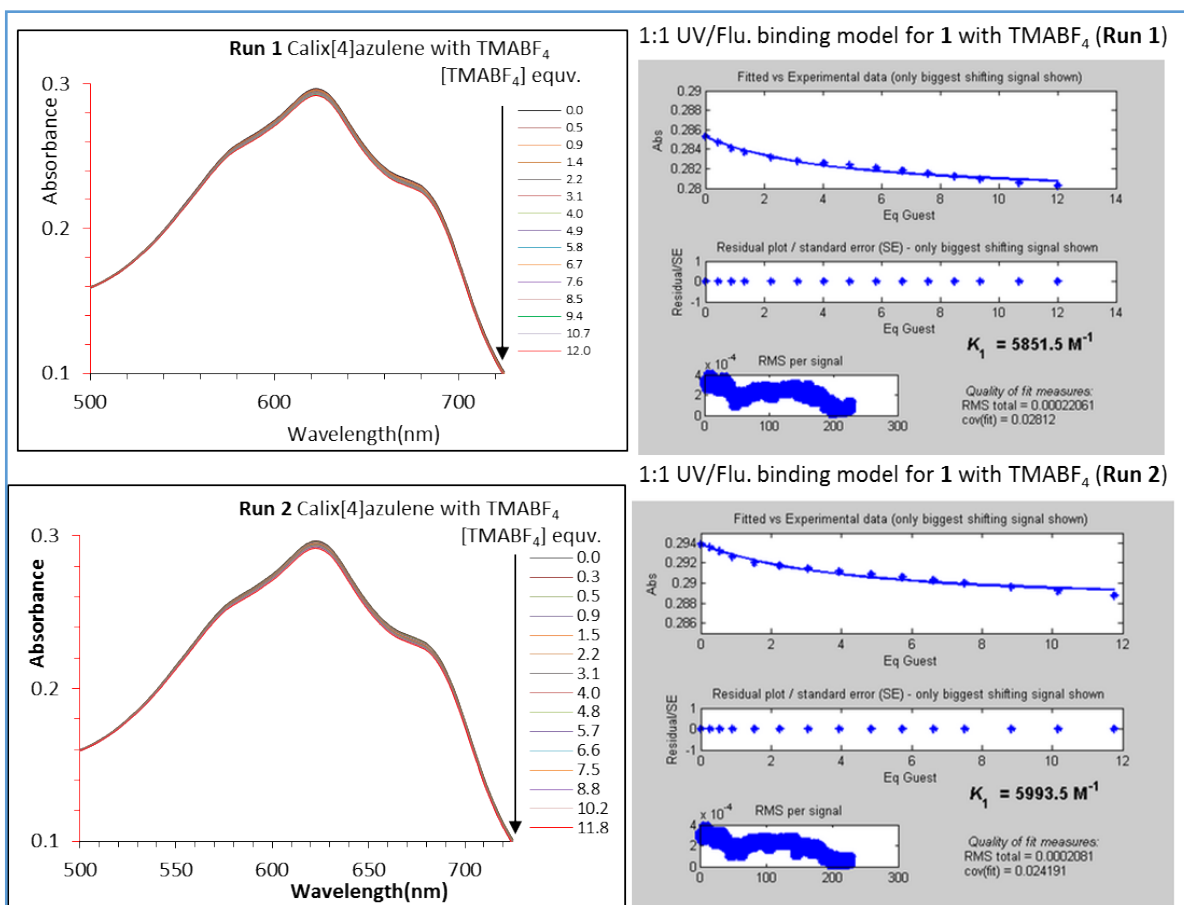

**Figure S4.** *Left side(Top and bottom):* UV-vis spectra of calix[4]azulene **1** ( $4.82 \times 10^{-5}$  M) upon addition of TMABF<sub>4</sub> (0~10 equivalents) in 9:1,v/v CH<sub>3</sub>Cl/CH<sub>3</sub>OH and *Right side(Top and bottom):* Screenshot ([www.supramol.com](http://www.supramol.com)) showing 1:1 binding model for calix[4]azulene **1** with TMABF<sub>4</sub>.

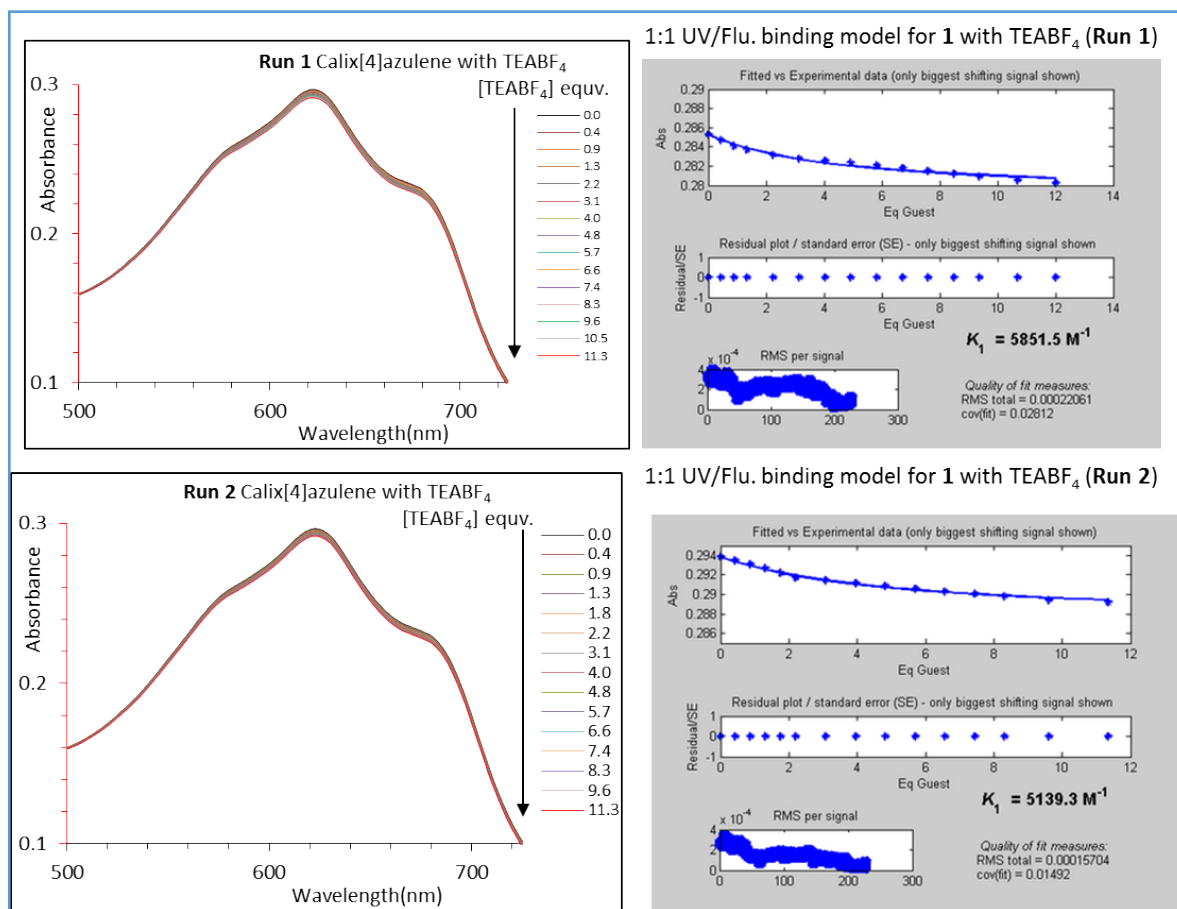

**Figure S5.** *Left side(Top and bottom):* UV-vis spectra of calix[4]azulene **1** ( $4.82 \times 10^{-5}$  M) upon addition of TEABF<sub>4</sub> (0~10 equivalents) in 9:1,v/v CH<sub>3</sub>Cl/CH<sub>3</sub>OH and *Right side(Top and bottom):* Screenshot ([www.supramol.com](http://www.supramol.com)) showing 1:1 binding model for calix[4]azulene **1** with TEABF<sub>4</sub>.

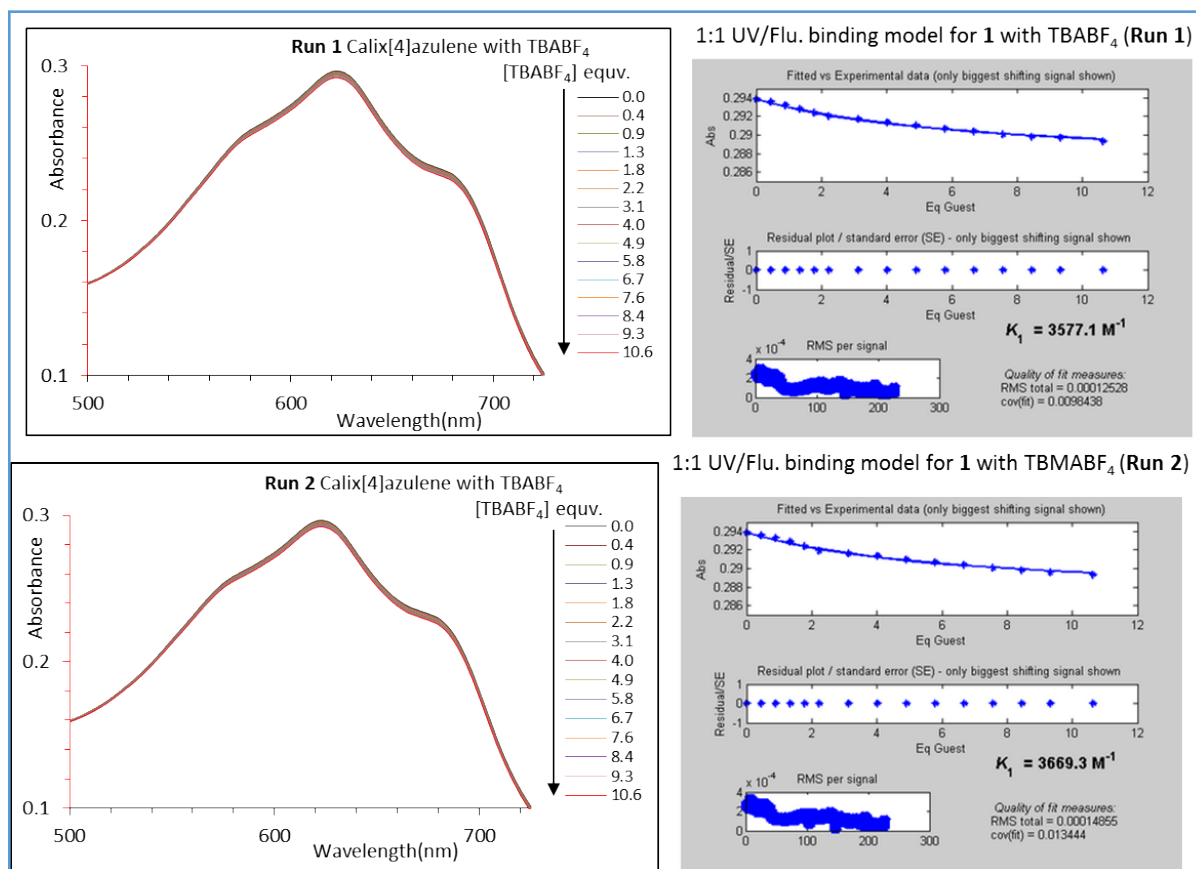

**Figure S6.** Left side (Top and bottom): UV-vis spectra of calix[4]azulene 1 ( $4.82 \times 10^{-5}$  M) upon addition of TBABF<sub>4</sub> (0~10 equivalents) in 9:1, v/v CH<sub>3</sub>Cl/CH<sub>3</sub>OH and Right side (Top and bottom): Screenshot ([www.supramol.com](http://www.supramol.com)) showing 1:1 binding model for 1 calix[4]azulene 1 with TBABF<sub>4</sub>.

## References

1. Frisch, M. J.; Trucks, G. W.; Schlegel, H. B.; Scuseria, G. E.; Robb, M. A.; Cheeseman, J. R.; Scalmani, G.; Barone, V.; Mennucci, B.; Petersson, G. A.; Nakatsuji, H.; Caricato, M.; Li, X.; Hratchian, H. P.; Izmaylov, A. F.; Bloino, J.; Zheng, G.; Sonnenberg, J. L.; Hada, M.; Ehara, M.; Toyota, K.; Fukuda, R.; Hasegawa, J.; Ishida, M.; Nakajima, T.; Honda, Y.; Kitao, O.; Nakai, H.; Vreven, T.; Montgomery, Jr. J. A.; Peralta, J. E.; Ogliaro, F.; Bearpark, M.; Heyd, J. J.; Brothers, E.; Kudin, K. N.; Staroverov, V. N.; Keith, T.; Kobayashi, R.; Normand, J.; Raghavachari, K.; Rendell, A.; Burant, J. C.; Iyengar, S. S.; Tomasi, J.; Cossi, M.; Rega, N.; Millam, J. M.; Klene, M.; Knox, J. E.; Cross, J. B.; Bakken, V.; Adamo, C.; Jaramillo, J.; Gomperts, R.; Stratmann, R. E.; Yazyev, O.; Austin, A. J.; Cammi, R.; Pomelli, C.; Ochterski, J. W.; Martin, R. L.; Morokuma, K.; Zakrzewski, V. G.; Voth, G. A.; Salvador, P.; Dannenberg, J. J.; Dapprich, S.; Daniels, A. D.; Farkas, O.; Foresman, J. B.; Ortiz, J. V.; Cioslowski, J.; Fox, D. J. *Gaussian 09, Revision D.01*; Gaussian, Inc., Wallingford CT, 2013.
2. (a) P. Thordarson, *Chem. Soc. Rev.*, 2011, **40**, 1305-1323; (b) [www.supramol.com](http://www.supramol.com).

## checkCIF/PLATON report

Structure factors have been supplied for datablock(s) shelxl

THIS REPORT IS FOR GUIDANCE ONLY. IF USED AS PART OF A REVIEW PROCEDURE FOR PUBLICATION, IT SHOULD NOT REPLACE THE EXPERTISE OF AN EXPERIENCED CRYSTALLOGRAPHIC REFEREE.

No syntax errors found.    CIF dictionary    Interpreting this report

### Datablock: shelxl

---

Bond precision:    C-C = 0.0030 A                      Wavelength=0.71075

Cell:                      a=21.779(11)              b=4.904(2)              c=27.269(12)  
                            alpha=90                      beta=97.075(8)              gamma=90

Temperature:              153 K

|                | Calculated   | Reported     |
|----------------|--------------|--------------|
| Volume         | 2890(2)      | 2891(2)      |
| Space group    | C 2/c        | C 1 2/c 1    |
| Hall group     | -C 2yc       | -C 2yc       |
| Moiety formula | C44 H32      | C44 H32      |
| Sum formula    | C44 H32      | C44 H32      |
| Mr             | 560.70       | 560.69       |
| Dx, g cm-3     | 1.289        | 1.288        |
| Z              | 4            | 4            |
| Mu (mm-1)      | 0.073        | 0.073        |
| F000           | 1184.0       | 1184.0       |
| F000'          | 1184.43      |              |
| h, k, lmax     | 26, 6, 34    | 26, 6, 34    |
| Nref           | 2988         | 2982         |
| Tmin, Tmax     | 0.989, 0.997 | 0.985, 0.998 |
| Tmin'          | 0.976        |              |

Correction method= # Reported T Limits: Tmin=0.985 Tmax=0.998  
AbsCorr = NUMERICAL

Data completeness= 0.998                      Theta(max)= 26.492

R(reflections)= 0.0658( 2647)              wR2(reflections)= 0.1415( 2982)

S = 1.179                      Npar= 200

---



The following ALERTS were generated. Each ALERT has the format  
**test-name\_ALERT\_alert-type\_alert-level.**  
Click on the hyperlinks for more details of the test.

---

● **Alert level C**

PLAT031\_ALERT\_4\_C Refined Extinction Parameter within Range ..... 2.667 Sigma

**Author Response: Refining the extinction parameter yielded slightly better refinement values, and so it was included with its standard uncertainty.**

PLAT906\_ALERT\_3\_C Large K value in the Analysis of Variance ..... 13.349 Check

**Author Response: The large value of K was for  $F_c/F_c(\max) = 0.007$ . All others were between 0.871 and 1.866.**

PLAT906\_ALERT\_3\_C Large K value in the Analysis of Variance ..... 2.098 Check

**Author Response: The large value of K was for  $F_c/F_c(\max) = 0.007$ . All others were between 0.871 and 1.866.**

PLAT911\_ALERT\_3\_C Missing # FCF Refl Between THmin & STh/L= 0.600 2 Report

**Author Response: These may have been obscured by the beamstop.**

---

● **Alert level G**

PLAT066\_ALERT\_1\_G Predicted and Reported Tmin&Tmax Range Identical ? Check

PLAT910\_ALERT\_3\_G Missing # of FCF Reflection(s) Below Th(Min) ... 3 Report

PLAT912\_ALERT\_4\_G Missing # of FCF Reflections Above STh/L= 0.600 2 Note

---

0 **ALERT level A** = Most likely a serious problem - resolve or explain  
0 **ALERT level B** = A potentially serious problem, consider carefully  
4 **ALERT level C** = Check. Ensure it is not caused by an omission or oversight  
3 **ALERT level G** = General information/check it is not something unexpected

1 ALERT type 1 CIF construction/syntax error, inconsistent or missing data  
0 ALERT type 2 Indicator that the structure model may be wrong or deficient  
4 ALERT type 3 Indicator that the structure quality may be low  
2 ALERT type 4 Improvement, methodology, query or suggestion  
0 ALERT type 5 Informative message, check

---

It is advisable to attempt to resolve as many as possible of the alerts in all categories. Often the minor alerts point to easily fixed oversights, errors and omissions in your CIF or refinement strategy, so attention to these fine details can be worthwhile. In order to resolve some of the more serious problems it may be necessary to carry out additional measurements or structure refinements. However, the purpose of your study may justify the reported deviations and the more serious of these should normally be commented upon in the discussion or experimental section of a paper or in the "special\_details" fields of the CIF. checkCIF was carefully designed to identify outliers and unusual parameters, but every test has its limitations and alerts that are not important in a particular case may appear. Conversely, the absence of alerts does not guarantee there are no aspects of the results needing attention. It is up to the individual to critically assess their own results and, if necessary, seek expert advice.

#### Publication of your CIF in IUCr journals

A basic structural check has been run on your CIF. These basic checks will be run on all CIFs submitted for publication in IUCr journals (*Acta Crystallographica*, *Journal of Applied Crystallography*, *Journal of Synchrotron Radiation*); however, if you intend to submit to *Acta Crystallographica Section C* or *E*, you should make sure that full publication checks are run on the final version of your CIF prior to submission.

#### Publication of your CIF in other journals

Please refer to the *Notes for Authors* of the relevant journal for any special instructions relating to CIF submission.

---

PLATON version of 29/01/2015; check.def file version of 29/01/2015

Datablock shel1 - ellipsoid plot

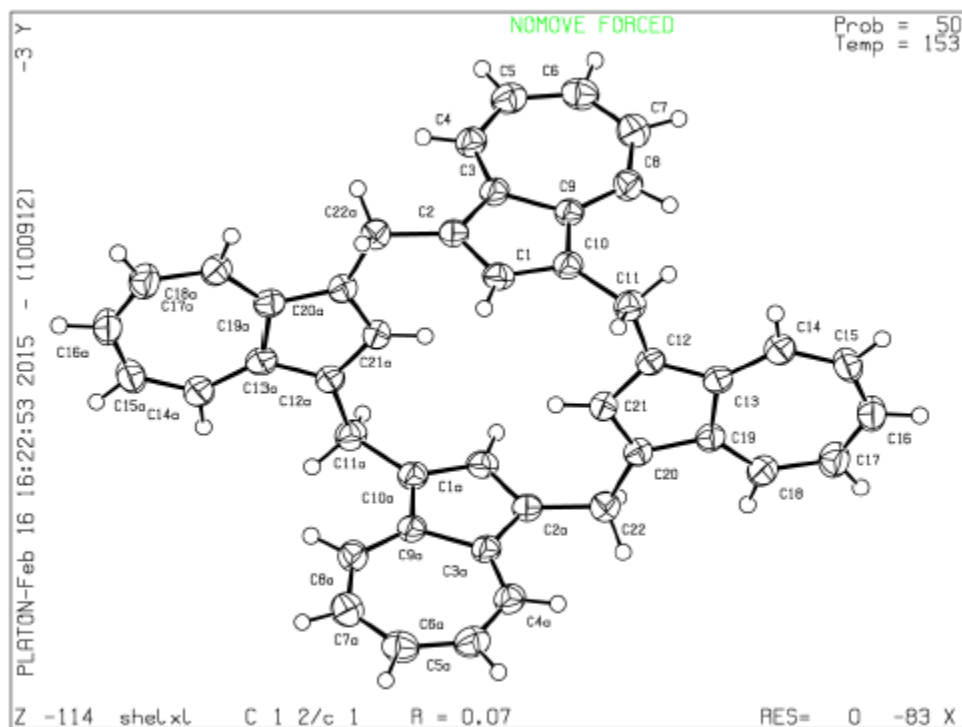

Supplement: c5ra07802d3.pdf [file c5ra07802d3.pdf]
